# Supplementary material
Source: PubMed Central journal article supplement (PMC8604569)
Supplement: mmc1.pdf [file mmc1.pdf]

Supplementary table 1

| <b>Antibody</b>                             | <b>Company</b>            | <b>catalog#</b> |
|---------------------------------------------|---------------------------|-----------------|
| β-actin                                     | Cell Signaling Technology | 4967            |
| PDIA3 (ERp57/ERp60)                         | proteintech               | 15967-1-AP      |
| GFP                                         | Thermo Fisher Scientific  | A-6455          |
| GORASP2                                     | proteintech               | 10598-1-AP      |
| KPNA4                                       | R&D system                | MAB8204         |
| LaminB1                                     | Santa Cruz Biotechnology  | sc-365962       |
| MAb414                                      | BioLegend                 | 902902          |
| NF-κB subunit p65                           | Santa Cruz Biotechnology  | sc-109          |
| NUP62                                       | Sigma-Aldrich             | N1163           |
| <b>Fluorescent secondary antibody</b>       |                           |                 |
| Goat anti-Rat IgG (H+L), Alexa Fluor 488    | Thermo Fisher Scientific  | A11006          |
| Goat anti-Rat IgG (H+L), Alexa Fluor 568    | Thermo Fisher Scientific  | A11077          |
| Goat anti-Mouse IgG (H+L), Alexa Fluor 633  | Thermo Fisher Scientific  | A21050          |
| Goat anti-Mouse IgG (H+L), Rhodamine Red-X  | Thermo Fisher Scientific  | R6393           |
| Goat anti-Rabbit IgG (H+L), Rhodamine Red-X | Thermo Fisher Scientific  | R6394           |
| <b>HRP-linked antibody</b>                  |                           |                 |
| Anti-Mouse IgG                              | Cell Signaling Technology | 7076S           |
| Anti-Rabbit IgG                             | Cell Signaling Technology | 7074S           |
| Anti-Rat IgG                                | Cell Signaling Technology | 7077S           |
